# Supplementary material for: Transparent porous films with real refractive index close to unity for photonic applications
Source: Royal Society of Chemistry journal article supplement (doi:10.1039/d4mh00826j), 2024-01-01
Supplement: d4mh00826j1.pdf [file d4mh00826j1.pdf]

## SUPPORTING INFORMATION

### Transparent porous films with real refractive index close to unity for photonic applications

José M. Miranda-Muñoz<sup>#</sup>, José M. Viaña<sup>#</sup>, Mauricio E. Calvo, Gabriel Lozano\*, and Hernán  
Míguez\*

<sup>2</sup>Instituto de Ciencias de Materiales de Sevilla (Consejo Superior de Investigaciones Científicas-  
Universidad de Sevilla), C/Américo Vespucio, 49, Sevilla, 41092, Spain.

<sup>#</sup>Equal contribution

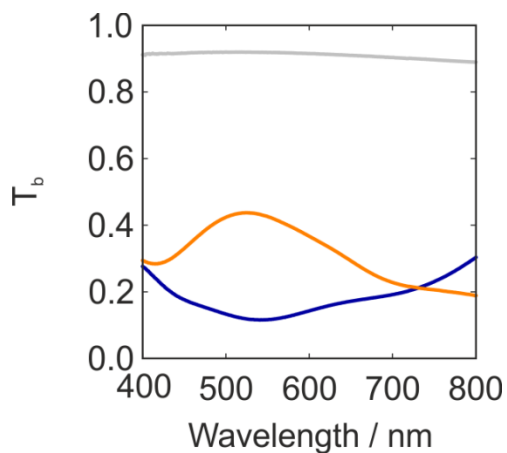

**Figure S1.** Ballistic transmittance spectra of an ultralow  $n$   $\text{SiO}_2$  film devoid of scattering centres (gray line) and integrating crystalline spherical  $\text{TiO}_2$  particles of radii  $r = 146 \pm 15$  nm (blue line) and  $r = 250 \pm 30$  nm (orange line), both with a filling fraction  $ff = 5\%$ .

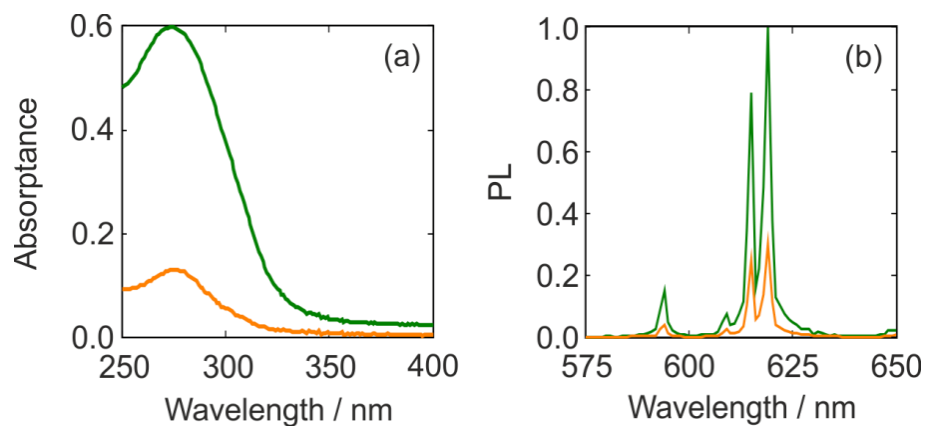

**Figure S2.** (a) Absorbance of the reference, which is a VO<sub>4</sub>Gd:Eu<sup>3+</sup> nanophosphor layer, (green line) and of a highly porous SiO<sub>2</sub> film with embedded VO<sub>4</sub>Gd:Eu<sup>3+</sup> nanoparticles (orange line). (b) Photoluminescence spectra of the reference (green line) and of a highly porous SiO<sub>2</sub> film with embedded VO<sub>4</sub>Gd:Eu<sup>3+</sup> nanoparticles (orange line). These results are raw results, i.e., not corrected by the absorbance and PLQY of the nanophosphors in each material.

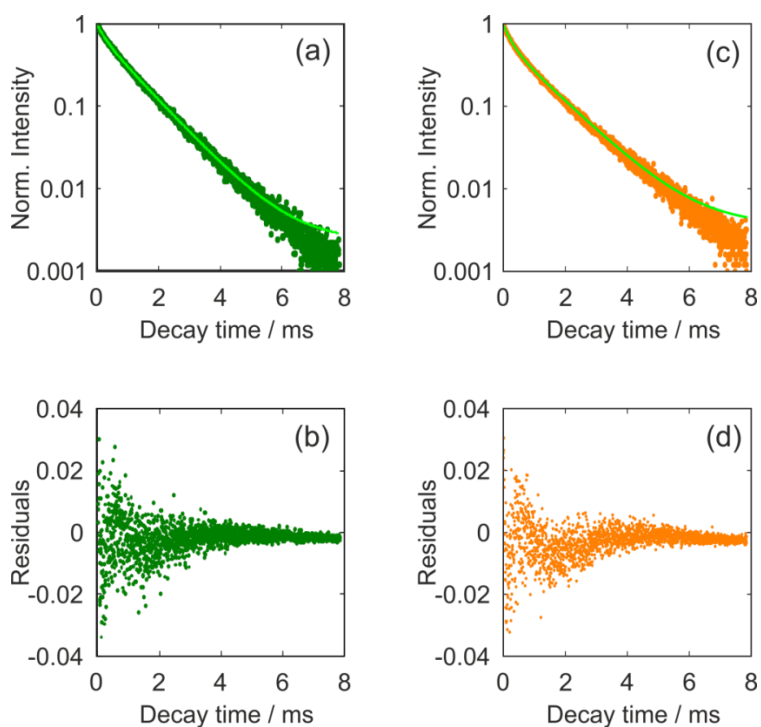

**Figure S3.** Time resolved PL decays of the  $\text{Eu}^{3+}$  cations of the nanophosphors under excitation at  $\lambda = 276$  nm and the corresponding curves (bright green line) resulting from fitting the decays to a bi-exponential model with their corresponding residuals. Data correspond to the reference, which is a  $\text{VO}_4\text{Gd:Eu}^{3+}$  nanophosphor layer, (a) and (b), and a highly porous  $\text{SiO}_2$  film with embedded  $\text{VO}_4\text{Gd:Eu}^{3+}$  nanoparticles, (c) and (d).

|                                                         | $\tau_1$ (ms) | % <sub>1</sub> | $\tau_2$ (ms) | % <sub>2</sub> | t (ms) |
|---------------------------------------------------------|---------------|----------------|---------------|----------------|--------|
| $\text{VO}_4\text{Gd:Eu}^{3+}$<br>nanophosphor<br>layer | 0.28          | 8              | 1.10          | 92             | 1.04   |
| $\text{VO}_4\text{Gd:Eu}^{3+}$<br>in porous<br>matrix   | 0.25          | 12             | 1.21          | 88             | 1.11   |

**Table S1.** Fitting parameters of the PL decays shown in Figure S3.
